# Supplementary material for: Bacterial AB5 toxins inhibit the growth of gut bacteria by targeting ganglioside-like glycoconjugates
Source: PubMed Central journal article supplement (PMC6437147; doi:10.1038/s41467-019-09362-z), 2019-03-27
Supplement: 41467_2019_9362_MOESM1_ESM.pdf [file 41467_2019_9362_MOESM1_ESM.pdf]

**Bacterial AB<sub>5</sub> toxins inhibit the growth of gut bacteria by targeting  
ganglioside-like glycoconjugates**

Patry *et al.*

**Supplementary Information**

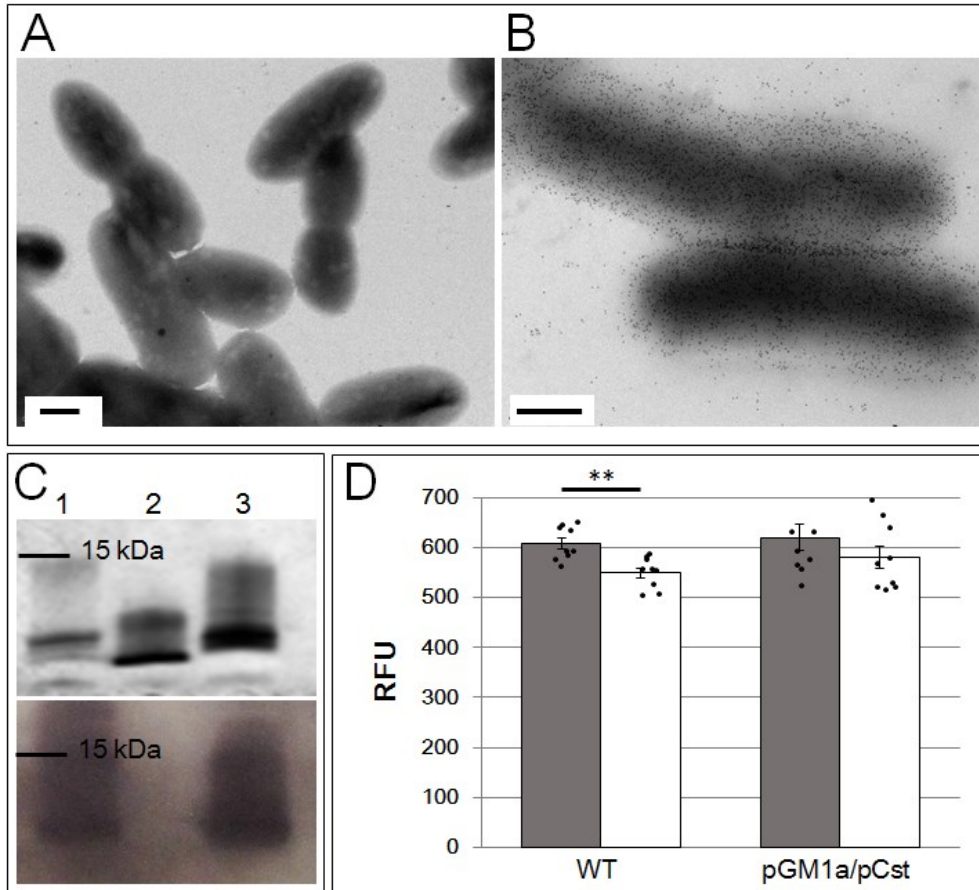

**Supplementary Figure 1. Cholera toxin B subunit (CTB) binds to *Escherichia coli* engineered to express GM1 ganglioside-mimicking lipooligosaccharides (LOS) but does not impact cell permeability.** Transmission electron microscopy following immunogold labeling with CTB was performed on (A) wildtype *E. coli* CWG 308, and (B) *E. coli* CWG 308 expressing pGM1/pCst (scale bars are 0.5  $\mu$ m). (C) Upper panel: Silver stain of LOS isolated from cells shown in A (lane 1), cells shown in B (lane 2), and from LOS isolated from *C. jejuni* HS:19 (lane 3); lower panel: far western blot of the same samples using CTB as a probe. (D) Each *E. coli* strain was incubated with ethidium bromide for 20 min following treatment with PBS (white, n=9) or CTB (grey, n=9) and their relative fluorescence was measured. Error bars represent standard error of the mean (\*\*p=0.0015, determined by two-tailed t-test). Source data are provided as a Source Data file.

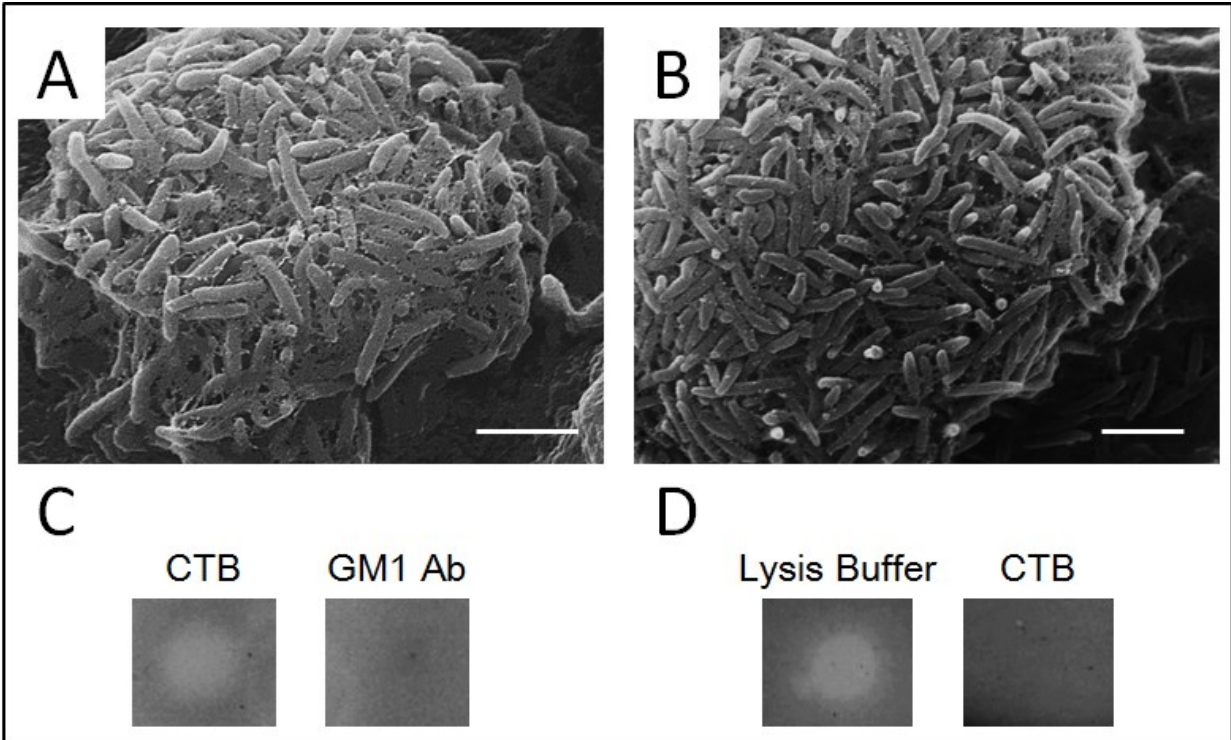

**Supplementary Figure 2. Cholera toxin B subunit (CTB) is bacteriostatic and not bactericidal to *C. jejuni* HS:19.** Scanning electron micrographs show surface morphology of *C. jejuni* HS:19 within (A) or outside (B) of the CTB zone of clearance. Agar clearance assays show the effect of various agents spotted either before (C) or after overnight *C. jejuni* HS:19 growth in soft agar (D). Scale bars are 2  $\mu\text{m}$ .

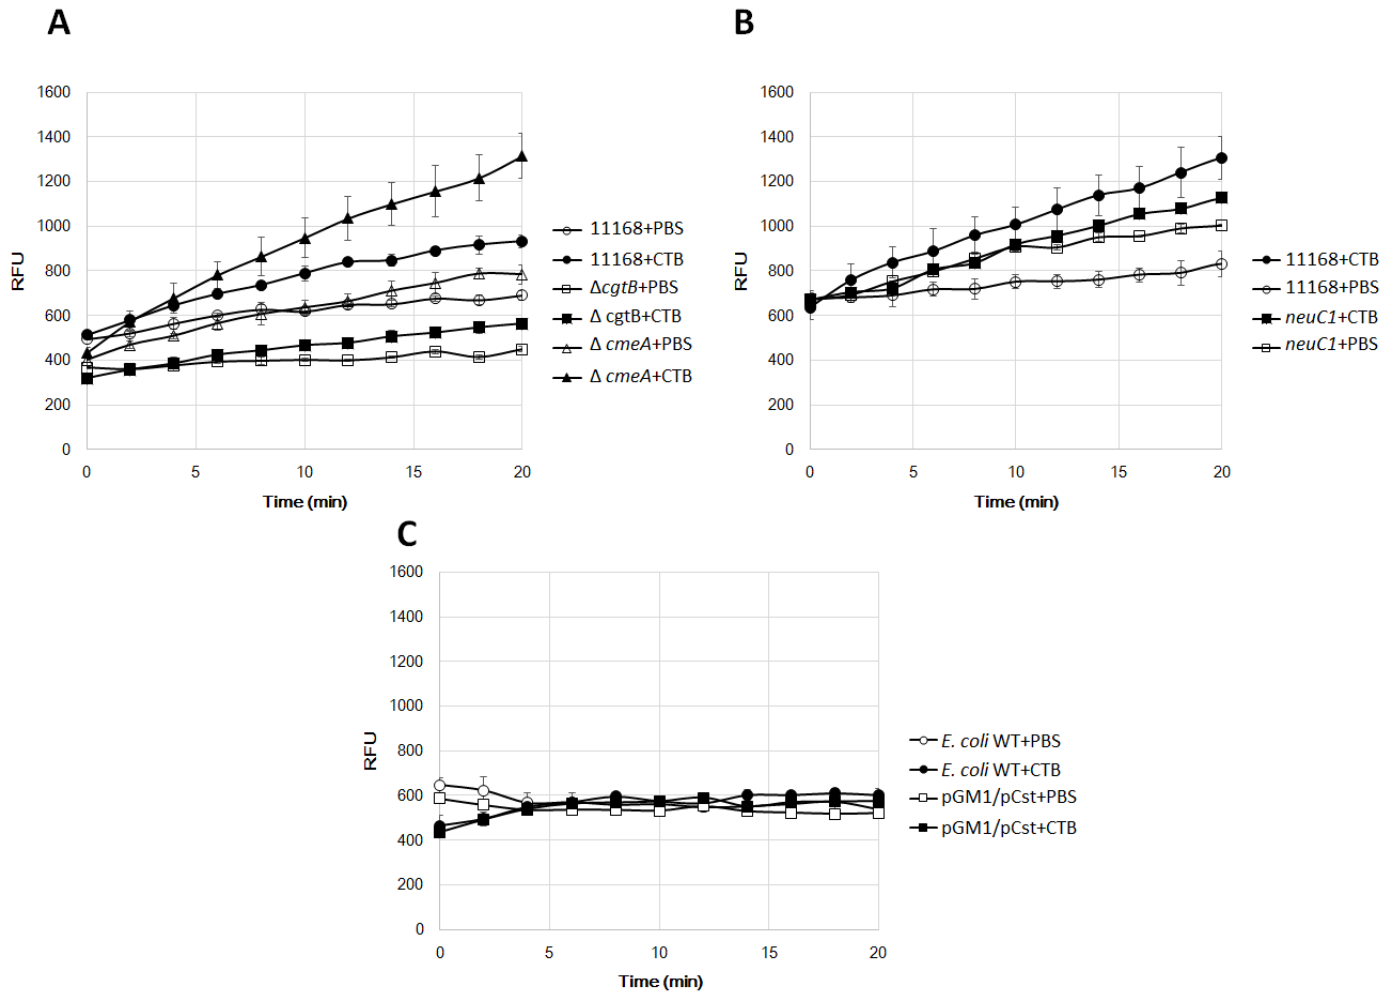

**Supplementary Figure 3. Graphs from representative experiments showing the relative fluorescence of bacterial strains following treatment with ethidium bromide. (A) *C. jejuni* 11168 wildtype,  $\Delta cgtB$  and  $\Delta cmeA$ , (B) *C. jejuni* 11168 and  $\Delta neuC1$ , or (C) *E. coli* CWG 308 and *E. coli* CWG 308 expressing pGM1/pCst were incubated with ethidium bromide for 20 min following treatment with PBS (control) or CTB and the relative fluorescence was measured (n=3 for each data point). Error bars represent standard deviation. Source data are provided as a Source Data file.**

**A**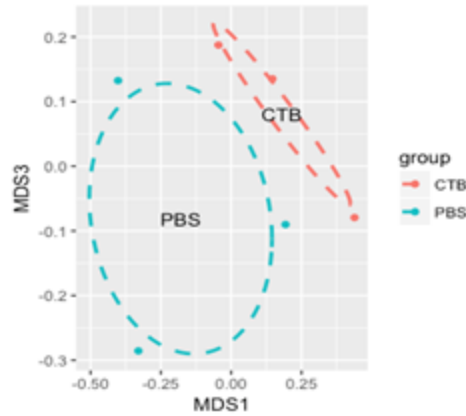**B**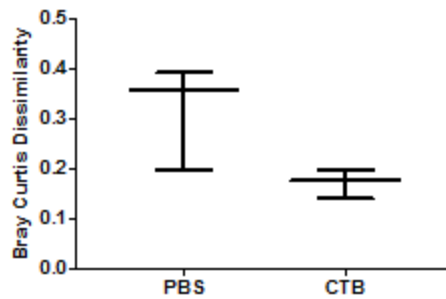**C**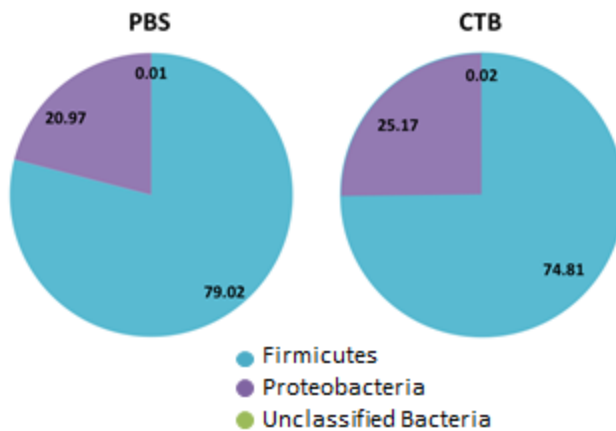

### Supplementary Figure 4. Administration of CTB toxin to chickens results in shifts in the intestinal microbiome resembling trends observed with LTB.

A small scale chicken experiment was done introducing either CTB (n=3) or PBS (n=3) and monitoring the relative changes in microbiome composition. **(A)** NMDS plot based on Bray-Curtis distances show that introduction of CTB causes a shift in the gut microbiome of chickens relative to chickens treated with PBS. **(B)** Similar to the effect of LTB in the chicken gut microbiome, LTB decreases  $\beta$ -diversity without affecting  $\alpha$ -diversity. **(C)** The toxin causes decreases in the relative abundance of Firmicutes with parallel increases in Proteobacteria.

Statistical analyses: Adonis PERMANOVA test for A, Mann-Whitney test for B and C.

Source data are provided as a Source Data file.

**Supplementary Table 1. A list of primers used in this study.**

| Primer name         | Sequence (5'-3')                                 | Use                                         |
|---------------------|--------------------------------------------------|---------------------------------------------|
| cgtB-mut-F-XhoI     | ATATCTCGAGGAGCTAAAATGAGTCAAATT<br>TCCATC         | <i>C. jejuni</i><br>11168<br>$\Delta$ cgtB  |
| cgtB-mut-R-SacI     | ATATGAGCTCGTTATGAAATTTTAAATATCT<br>TTACGG        |                                             |
| InvPCR-cgtB-F-BamHI | ATATGGATCCGGACAATGTGGGCTAAAATA<br>ATC            |                                             |
| InvPCR-cgtB-R-BamHI | ATATGGATCCGGATTTTATAGTTTAAAGTATT<br>TGC          |                                             |
| neuC1F15            | TTTTGTTAGCGGAAGTAGAGCTGAT                        | <i>C. jejuni</i><br>11168<br>$\Delta$ neuC1 |
| neuC1R984           | TAATACGACTCACTATAGGGATTAAAATC<br>GCTTCCAATATATCC |                                             |
| CmeA-F              | TTATTGTGCTCCAATTTCTTTAACTTC                      | <i>C. jejuni</i><br>11168<br>$\Delta$ cmeA  |
| CmeA-R              | ATGAAATTATTTCAAAAAATACTATTTTAG                   |                                             |
| CmeA-os-R           | TAGGAGGGGTAAAGAAGGATATTG                         |                                             |
| CmeA-os-F           | TTTCTAAATGGAATCAATAGCT                           |                                             |
| DL39                | TTAAGAGCAAGATATGAAGGTG                           | <i>cgtB</i> gene<br>sequencing              |
| DL41                | CCATTTGAATTGATATTTTIG                            |                                             |
| primer 1139R        | TTAGCCACATTGTCCAAA                               |                                             |
| 926F                | AAACTYAAAKGAATWGRCGG                             | 16S rRNA<br>sequence<br>analysis            |
| 1392R               | ACGGGCGGTGWGTRC                                  |                                             |
| 926R                | ACCGCTTGTGCGGGCCC                                |                                             |
| 515F                | GTGCCAGCMGCCGCGGTAA                              |                                             |
| 1068F               | GCATGGCYGYCGTCAG                                 |                                             |
| 1391R               | GACGGGCGGTGTGTRCA                                |                                             |
| 519R                | GWATTACCGCGGCKGCTG                               |                                             |
| 27F                 | AGAGTTTGATCCTGGCTCAG                             |                                             |
| 1492R               | GGTTACCTTGTTACGACTT                              |                                             |

R=A or G, Y=C or T, W=A or T, K=G or T, M=A or C

**Supplementary Table 2. List of BioSample accession numbers for the 16S rRNA datasets.**

| Sample name | Accession number | Sample name | Accession number |
|-------------|------------------|-------------|------------------|
| 454         | SAMN10962775     | 467         | SAMN10962788     |
| 455         | SAMN10962776     | 468         | SAMN10962789     |
| 456         | SAMN10962777     | 469         | SAMN10962790     |
| 457         | SAMN10962778     | 470         | SAMN10962791     |
| 458         | SAMN10962779     | 471         | SAMN10962792     |
| 459         | SAMN10962780     | 472         | SAMN10962793     |
| 460         | SAMN10962781     | 301         | SAMN10962794     |
| 461         | SAMN10962782     | 302         | SAMN10962795     |
| 462         | SAMN10962783     | 303         | SAMN10962796     |
| 463         | SAMN10962784     | 304         | SAMN10962797     |
| 464         | SAMN10962785     | 305         | SAMN10962798     |
| 465         | SAMN10962786     | 306         | SAMN10962799     |
| 466         | SAMN10962787     |             |                  |
